# Psychiatric Services

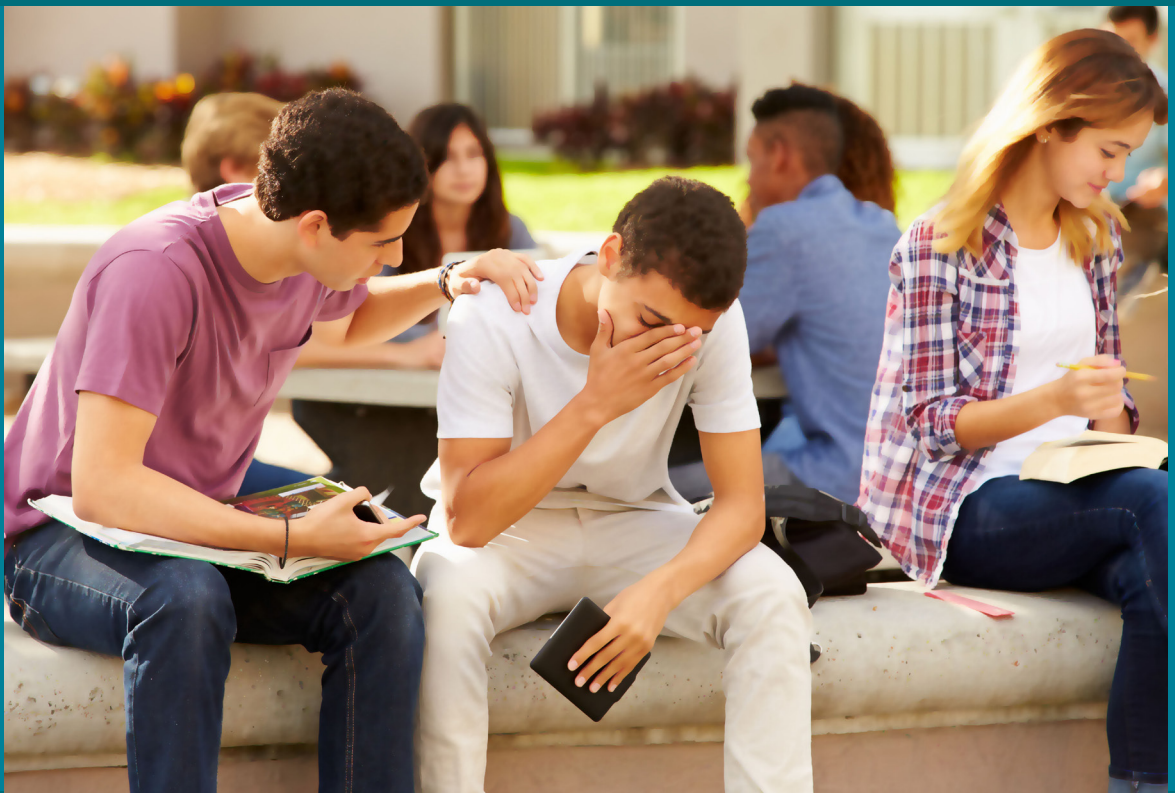

Increased risk of untreated mental illness among multiracial and Asian college students

Elevated risk of death among veterans within 90 days of inpatient discharge

Why pregnant women with major depression are not receiving mental health care

Open Forum: recommendations from the PhenX Early Psychosis Working Group
